# Supplementary material for: Rhesus macaques form preferences for brand logos through sex and social status based advertising
Source: PubMed Central journal article supplement (PMC5819778; doi:10.1371/journal.pone.0193055), 2018-02-20
Supplement: pone.0193055.s002.pdf [file pone.0193055.s002.pdf]

| Dependent Variable: Picked Social Logo (0/1) |                                |                                |                                |                                |                   |                               |
|----------------------------------------------|--------------------------------|--------------------------------|--------------------------------|--------------------------------|-------------------|-------------------------------|
|                                              | Model 1                        | Model 2                        | Model 3                        | Model 4                        | Model 5           | Model 6                       |
| sex Male                                     | 0.015<br>(0.165)               | 0.015<br>(0.165)               | 0.015<br>(0.165)               | 0.206<br>(0.144)               | 0.206<br>(0.144)  | 0.206<br>(0.144)              |
| trialcat PeriVsRest                          | 0.102<br>(0.069)               |                                |                                | 0.106<br>(0.069)               |                   |                               |
| trialcat DomVsSub                            | 0.221 <sup>†</sup><br>(0.117)  |                                |                                | 0.209 <sup>†</sup><br>(0.117)  |                   |                               |
| trialcat DomVsRest                           |                                | 0.060<br>(0.068)               |                                |                                | 0.052<br>(0.068)  |                               |
| trialcat PeriVsSub                           |                                | 0.264*<br>(0.119)              |                                |                                | 0.264*<br>(0.118) |                               |
| trialcat SubVsRest                           |                                |                                | -0.162*<br>(0.068)             |                                |                   | -0.158*<br>(0.067)            |
| trialcat PeriVsDom                           |                                |                                | 0.042<br>(0.120)               |                                |                   | 0.055<br>(0.119)              |
| nDomAds                                      | -0.033 <sup>†</sup><br>(0.018) | -0.033 <sup>†</sup><br>(0.018) | -0.033 <sup>†</sup><br>(0.018) |                                |                   |                               |
| DomAdDiff                                    | 0.033*<br>(0.016)              | 0.033*<br>(0.016)              | 0.033*<br>(0.016)              |                                |                   |                               |
| nSubAds                                      | -0.016<br>(0.018)              | -0.016<br>(0.018)              | -0.016<br>(0.018)              |                                |                   |                               |
| SubAdDiff                                    | -0.005<br>(0.015)              | -0.005<br>(0.015)              | -0.005<br>(0.015)              |                                |                   |                               |
| nHQAds                                       | 0.055*<br>(0.024)              | 0.055*<br>(0.024)              | 0.055*<br>(0.024)              |                                |                   |                               |
| HQAdDiff                                     | 0.007<br>(0.017)               | 0.007<br>(0.017)               | 0.007<br>(0.017)               |                                |                   |                               |
| sex Male:trialcat PeriVsRest                 | -0.071<br>(0.098)              |                                |                                | -0.069<br>(0.097)              |                   |                               |
| sex Male:trialcat DomVsSub                   | -0.336*<br>(0.167)             |                                |                                | -0.305 <sup>†</sup><br>(0.165) |                   |                               |
| sex Male:trialcat DomVsRest                  |                                | -0.132<br>(0.097)              |                                |                                | -0.118<br>(0.096) |                               |
| sex Male:trialcat PeriVsSub                  |                                | -0.274<br>(0.169)              |                                |                                | -0.255<br>(0.168) |                               |
| sex Male:trialcat SubVsRest                  |                                |                                | 0.203*<br>(0.097)              |                                |                   | 0.187 <sup>†</sup><br>(0.096) |
| sex Male:trialcat PeriVsDom                  |                                |                                | 0.062<br>(0.169)               |                                |                   | 0.050<br>(0.168)              |
| Intercept                                    | 0.257 <sup>†</sup><br>(0.139)  | 0.257 <sup>†</sup><br>(0.139)  | 0.257 <sup>†</sup><br>(0.139)  | 0.142<br>(0.102)               | 0.142<br>(0.102)  | 0.142<br>(0.102)              |
| Observations                                 | 886                            | 886                            | 886                            | 886                            | 886               | 886                           |
| Log Likelihood                               | -598.762                       | -598.762                       | -598.762                       | -603.218                       | -603.218          | -603.218                      |
| Akaike Inf. Crit.                            | 1,223.524                      | 1,223.524                      | 1,223.524                      | 1,220.436                      | 1,220.436         | 1,220.436                     |
| Bayesian Inf. Crit.                          | 1,285.751                      | 1,285.751                      | 1,285.751                      | 1,253.943                      | 1,253.943         | 1,253.943                     |

Notes: \* p < 0.05, † p < 0.10
