# Supplementary material for: Rhesus macaques form preferences for brand logos through sex and social status based advertising
Source: PubMed Central journal article supplement (PMC5819778; doi:10.1371/journal.pone.0193055), 2018-02-20
Supplement: pone.0193055.s003.pdf [file pone.0193055.s003.pdf]

Dependent Variable: Picked Social Logo (0/1)

|                              | Model 7            | Model 8            | Model 9            | Model 10           | Model 11           | Model 12           |
|------------------------------|--------------------|--------------------|--------------------|--------------------|--------------------|--------------------|
| Response Time                | 0.557**<br>(0.183) | 0.557**<br>(0.183) | 0.557**<br>(0.183) | 0.579**<br>(0.180) | 0.579**<br>(0.180) | 0.579**<br>(0.180) |
| sex Male                     | 0.034<br>(0.166)   | 0.034<br>(0.166)   | 0.034<br>(0.166)   | 0.229†<br>(0.137)  | 0.229†<br>(0.137)  | 0.229†<br>(0.137)  |
| trialcat PeriVsRest          | 0.112<br>(0.069)   |                    |                    | 0.115†<br>(0.069)  |                    |                    |
| trialcat DomVsSub            | 0.216†<br>(0.118)  |                    |                    | 0.200†<br>(0.117)  |                    |                    |
| trialcat DomVsRest           |                    | 0.052<br>(0.069)   |                    |                    | 0.043<br>(0.068)   |                    |
| trialcat PeriVsSub           |                    | 0.276*<br>(0.119)  |                    |                    | 0.273*<br>(0.118)  |                    |
| trialcat SubVsRest           |                    |                    | -0.164*<br>(0.068) |                    |                    | -0.158*<br>(0.068) |
| trialcat PeriVsDom           |                    |                    | 0.059<br>(0.120)   |                    |                    | 0.072<br>(0.119)   |
| nDomAds                      | -0.025<br>(0.019)  | -0.025<br>(0.019)  | -0.025<br>(0.019)  |                    |                    |                    |
| DomAdDiff                    | 0.032*<br>(0.016)  | 0.032*<br>(0.016)  | 0.032*<br>(0.016)  |                    |                    |                    |
| nSubAds                      | -0.018<br>(0.018)  | -0.018<br>(0.018)  | -0.018<br>(0.018)  |                    |                    |                    |
| SubAdDiff                    | 0.001<br>(0.015)   | 0.001<br>(0.015)   | 0.001<br>(0.015)   |                    |                    |                    |
| nHQAds                       | 0.050*<br>(0.024)  | 0.050*<br>(0.024)  | 0.050*<br>(0.024)  |                    |                    |                    |
| HQAdDiff                     | 0.010<br>(0.017)   | 0.010<br>(0.017)   | 0.010<br>(0.017)   |                    |                    |                    |
| sex Male:trialcat PeriVsRest | -0.094<br>(0.099)  |                    |                    | -0.095<br>(0.098)  |                    |                    |
| sex Male:trialcat DomVsSub   | -0.310†<br>(0.168) |                    |                    | -0.271<br>(0.166)  |                    |                    |
| sex Male:trialcat DomVsRest  |                    | -0.108<br>(0.098)  |                    |                    | -0.088<br>(0.097)  |                    |
| sex Male:trialcat PeriVsSub  |                    | -0.297†<br>(0.170) |                    |                    | -0.277<br>(0.169)  |                    |
| sex Male:trialcat SubVsRest  |                    |                    | 0.202*<br>(0.097)  |                    |                    | 0.183†<br>(0.096)  |
| sex Male:trialcat PeriVsDom  |                    |                    | 0.014<br>(0.171)   |                    |                    | -0.007<br>(0.169)  |
| Intercept                    | 0.211<br>(0.140)   | 0.211<br>(0.140)   | 0.211<br>(0.140)   | 0.090<br>(0.098)   | 0.090<br>(0.098)   | 0.090<br>(0.098)   |
| Observations                 | 886                | 886                | 886                | 886                | 886                | 886                |
| Log Likelihood               | -593.905           | -593.905           | -593.905           | -597.788           | -597.788           | -597.788           |
| Akaike Inf. Crit.            | 1,215.810          | 1,215.810          | 1,215.810          | 1,211.576          | 1,211.576          | 1,211.576          |
| Bayesian Inf. Crit.          | 1,282.824          | 1,282.824          | 1,282.824          | 1,249.869          | 1,249.869          | 1,249.869          |

Notes: †p<0.1; \*p<0.05; \*\*p<0.01
