# Supplementary material for: Rhesus macaques form preferences for brand logos through sex and social status based advertising
Source: PubMed Central journal article supplement (PMC5819778; doi:10.1371/journal.pone.0193055), 2018-02-20
Supplement: pone.0193055.s004.pdf [file pone.0193055.s004.pdf]

|                     | Dependent Variable: Response Time |                    |                                |                    |                    |                    |                    |                     |
|---------------------|-----------------------------------|--------------------|--------------------------------|--------------------|--------------------|--------------------|--------------------|---------------------|
|                     | RT-1                              | RT-2               | RT-3                           | RT-4               | RT-5               | RT-6               | RT-7               | RT-8                |
| nHQAds              | -0.003*<br>(0.001)                |                    |                                | -0.003*<br>(0.001) |                    |                    | -0.0001<br>(0.005) | 0.003<br>(0.006)    |
| nDomAds             |                                   | -0.003*<br>(0.001) |                                |                    | -0.003*<br>(0.001) |                    | -0.005<br>(0.004)  | -0.011*<br>(0.005)  |
| nSubAds             |                                   |                    | -0.002 <sup>†</sup><br>(0.001) |                    |                    | -0.002<br>(0.001)  | 0.002<br>(0.004)   | 0.005<br>(0.005)    |
| HQAdDiff            |                                   |                    |                                | -0.001<br>(0.003)  |                    |                    |                    | -0.003<br>(0.004)   |
| DomAdDiff           |                                   |                    |                                |                    | -0.001<br>(0.003)  |                    |                    | -0.00005<br>(0.004) |
| SubAdDiff           |                                   |                    |                                |                    |                    | -0.004<br>(0.004)  |                    | -0.008*<br>(0.004)  |
| Intercept           | 0.077*<br>(0.034)                 | 0.077*<br>(0.034)  | 0.077*<br>(0.034)              | 0.075*<br>(0.035)  | 0.077*<br>(0.034)  | 0.083**<br>(0.031) | 0.077*<br>(0.035)  | 0.076*<br>(0.030)   |
| Observations        | 886                               | 886                | 886                            | 886                | 886                | 886                | 886                | 886                 |
| Log Likelihood      | -451.174                          | -450.267           | -451.715                       | -456.127           | -455.002           | -455.872           | -459.216           | -470.540            |
| Akaike Inf. Crit.   | 910.348                           | 908.533            | 911.430                        | 922.253            | 920.004            | 921.745            | 930.433            | 959.080             |
| Bayesian Inf. Crit. | 929.495                           | 927.680            | 930.577                        | 946.187            | 943.938            | 945.678            | 959.153            | 1,002.160           |

Note: <sup>†</sup>p<0.1; \* p<0.05; \*\* p<0.01
